# Supplementary material
Source: PubMed Central journal article supplement (PMC4006693)

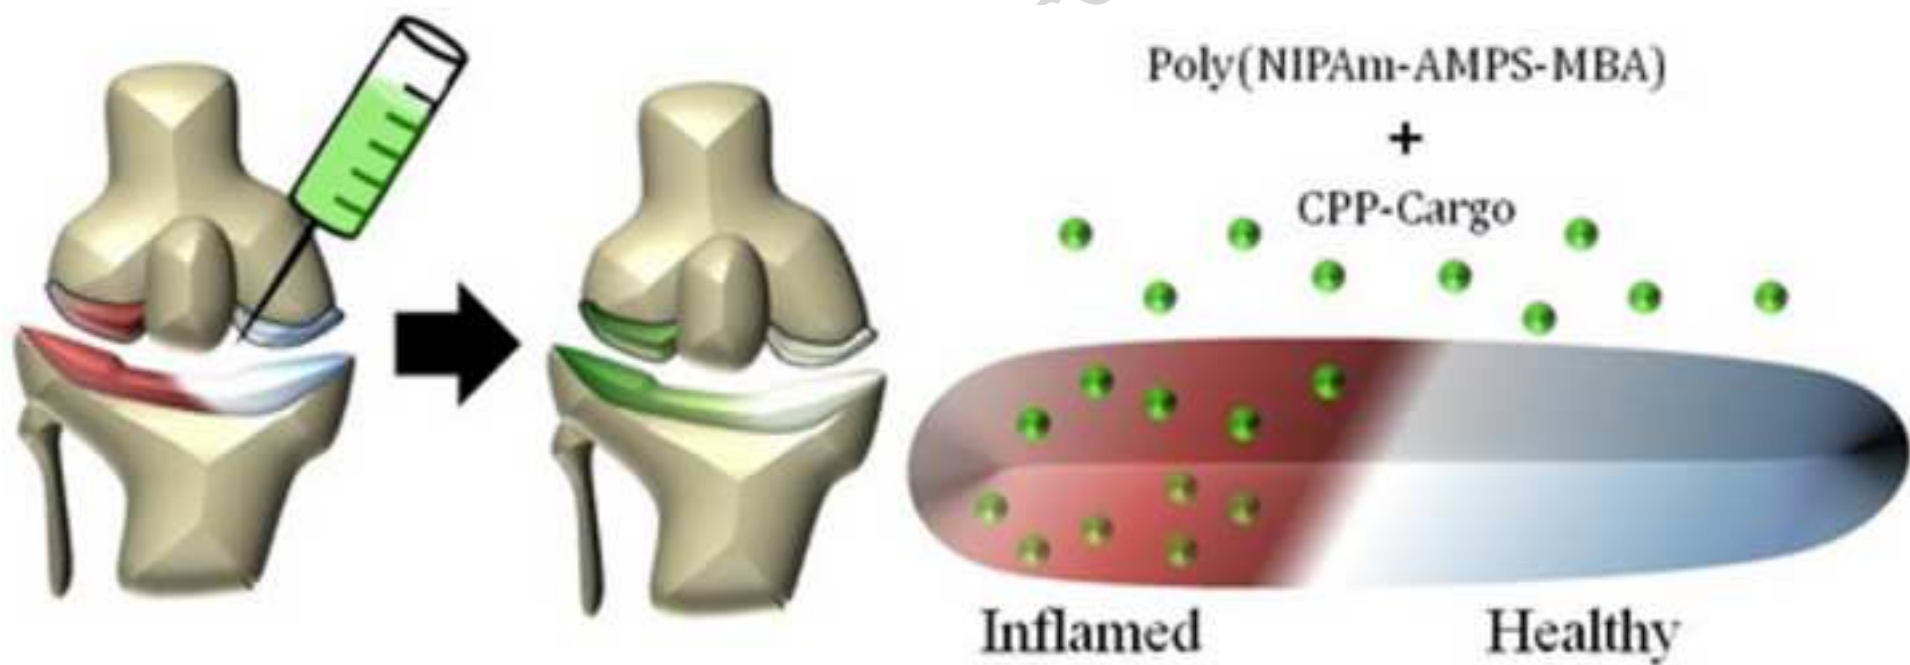

Supplement: NIHMS568558-supplement-01.pdf [file NIHMS568558-supplement-01.pdf]
